# Supplementary figures and images for: Estimating the impact of school closure on social mixing behaviour and the transmission of close contact infections in eight European countries
Source: Springer Nature journal article supplement (doi:10.1186/1471-2334-9-187), 2009-11-27

**BE**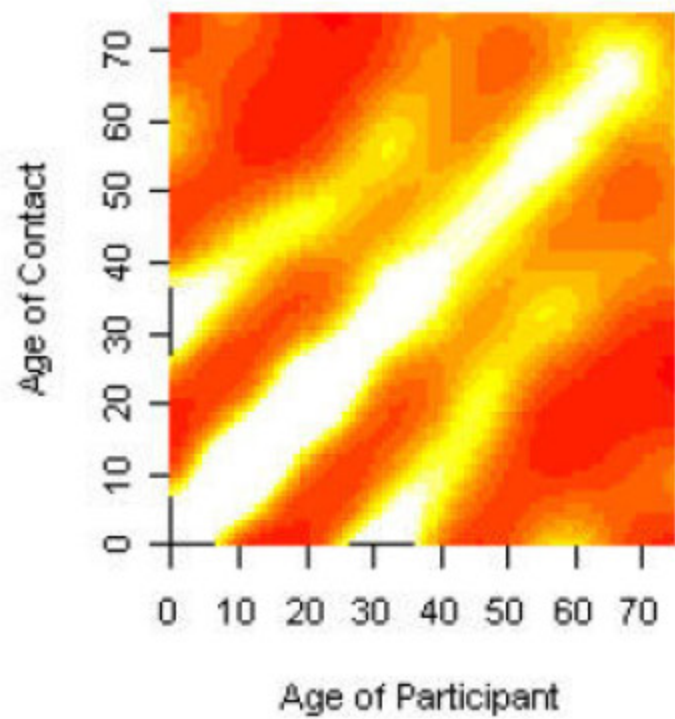**DE**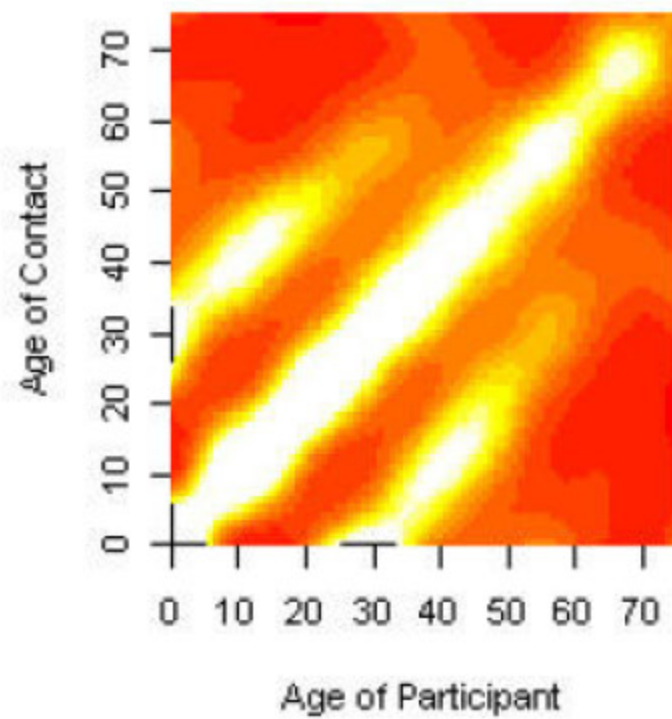**FI**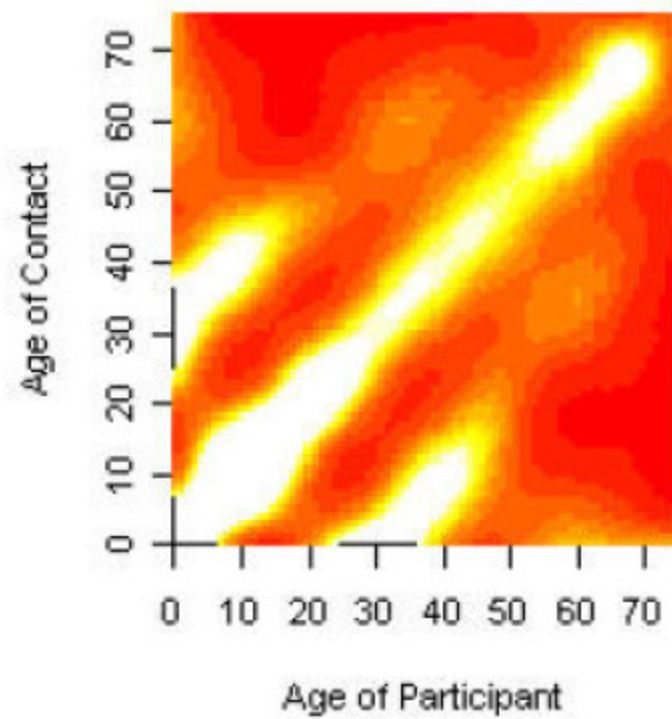**GB**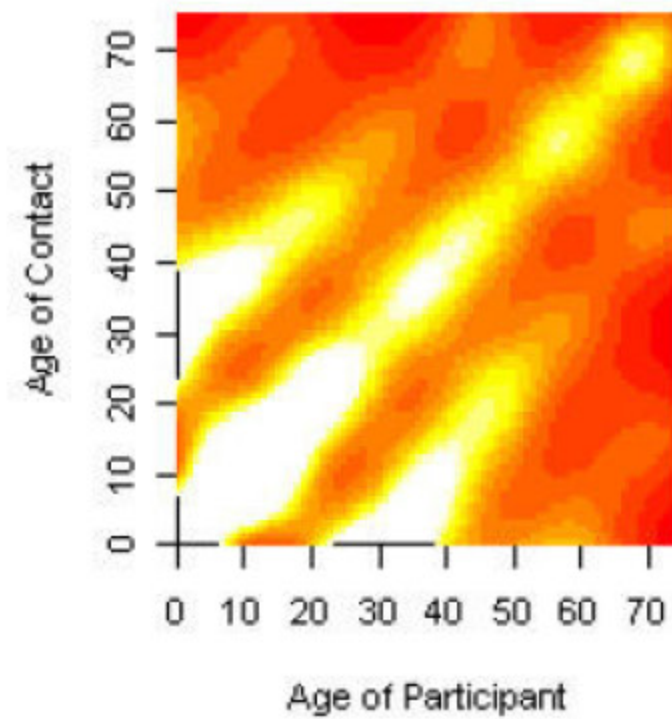**IT**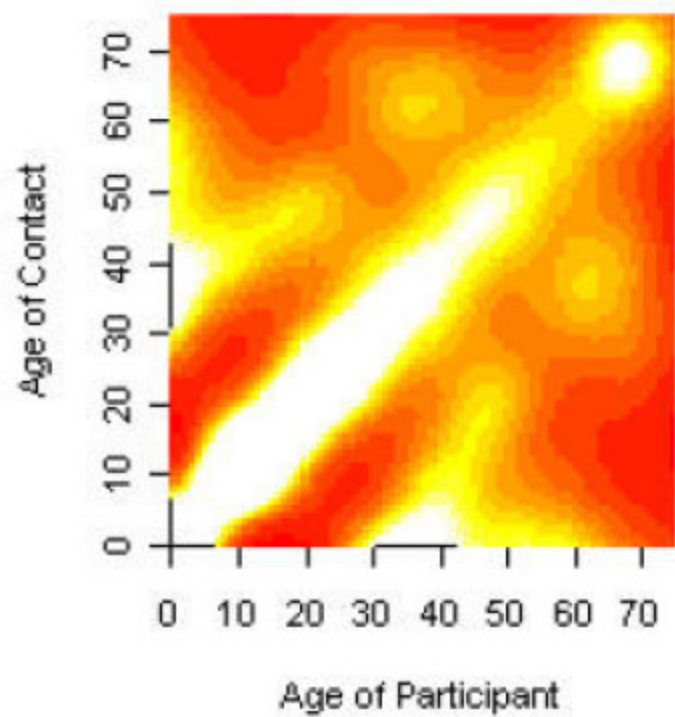**LU**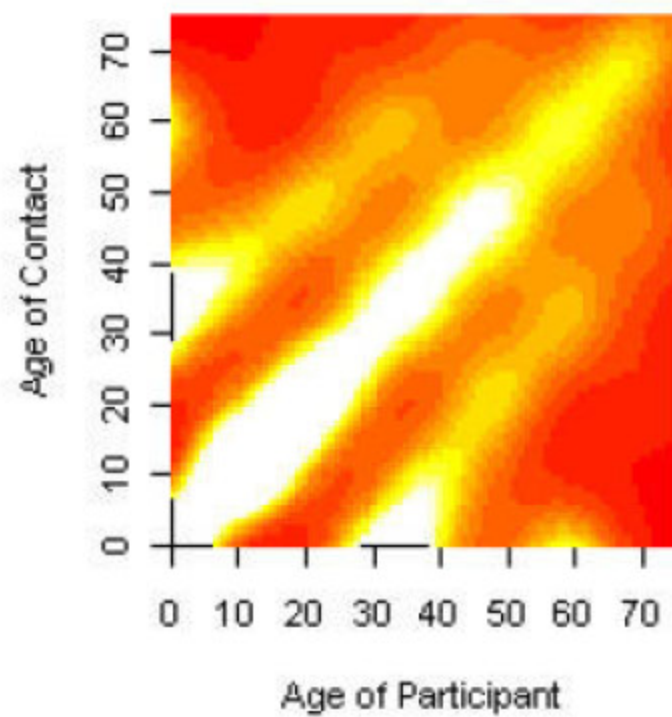**NL**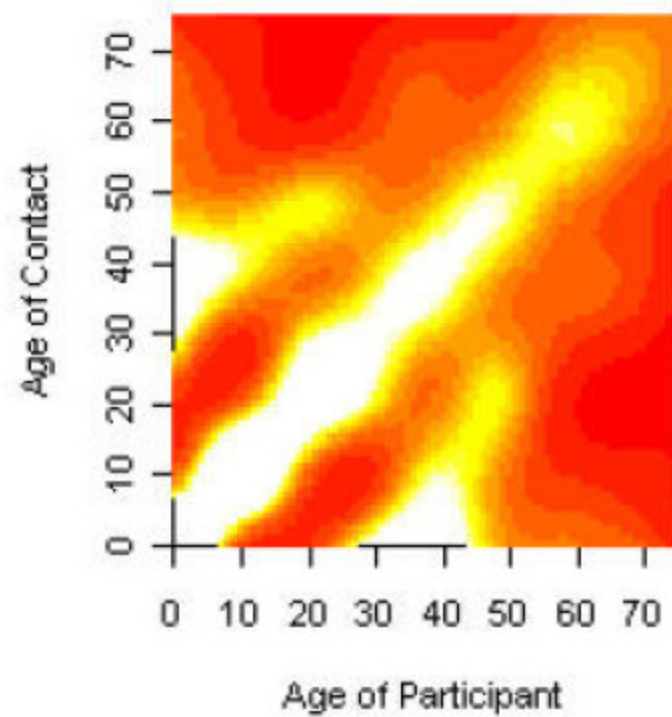**PL**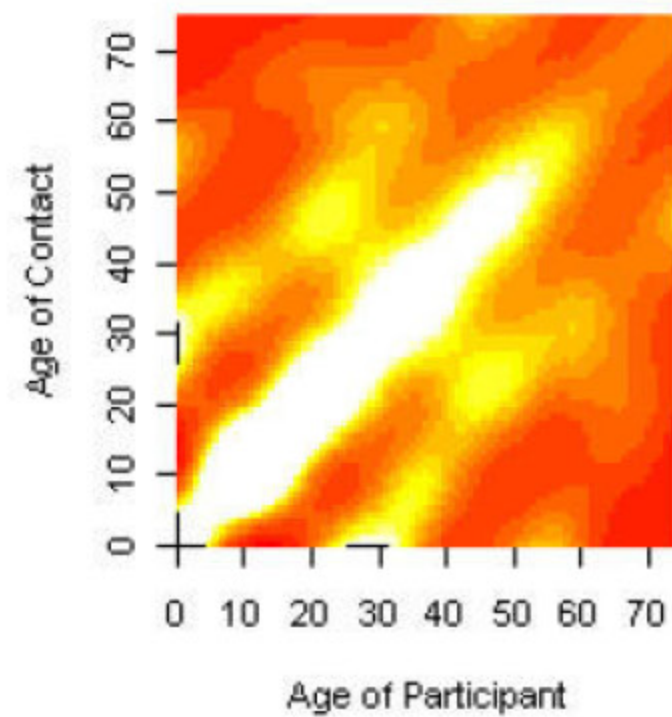

Supplement: 12879_2009_952_MOESM1_ESM.pdf [file 12879_2009_952_MOESM1_ESM.pdf]

**BE**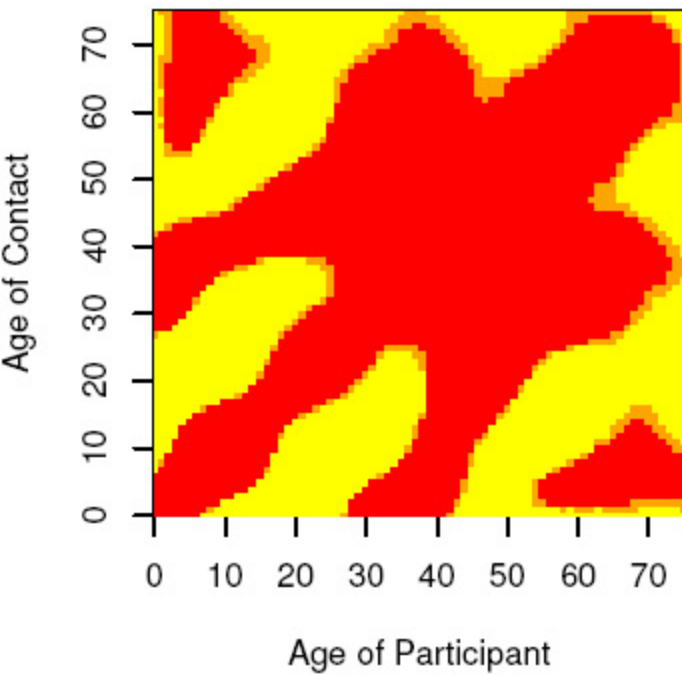**GB**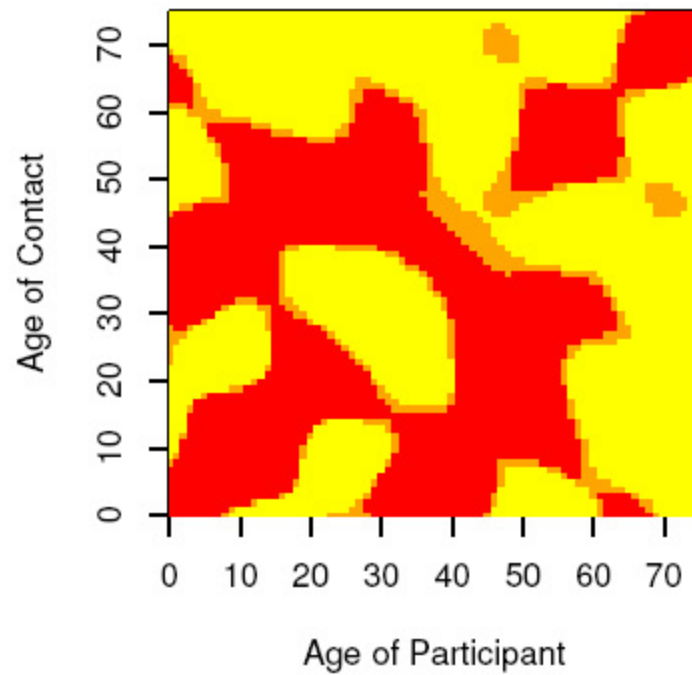**IT**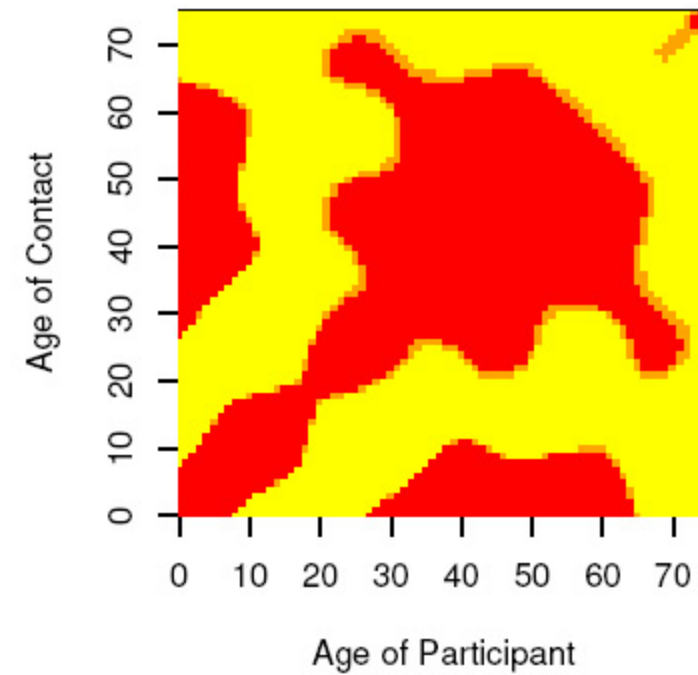**LU**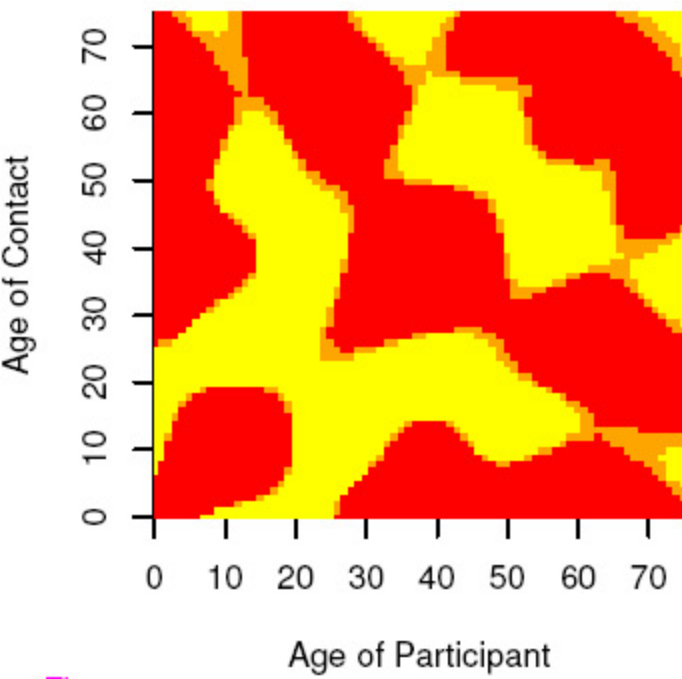**NL**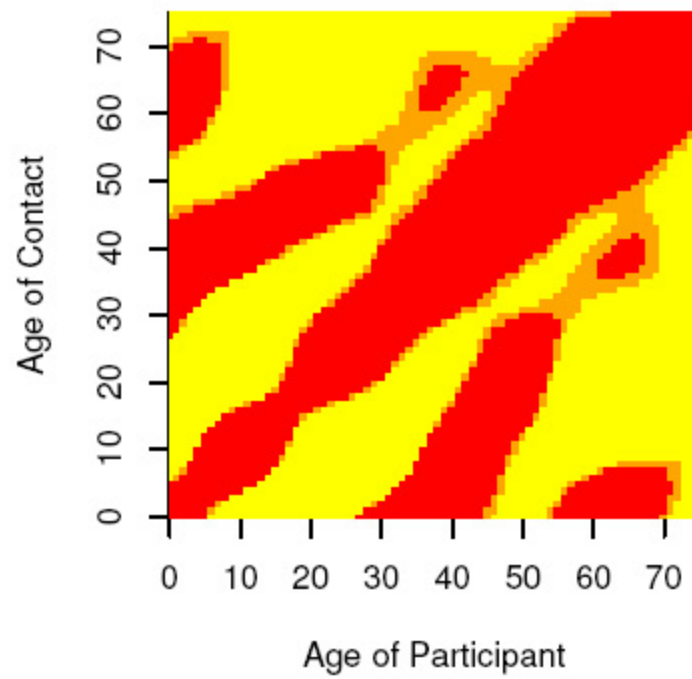**PL**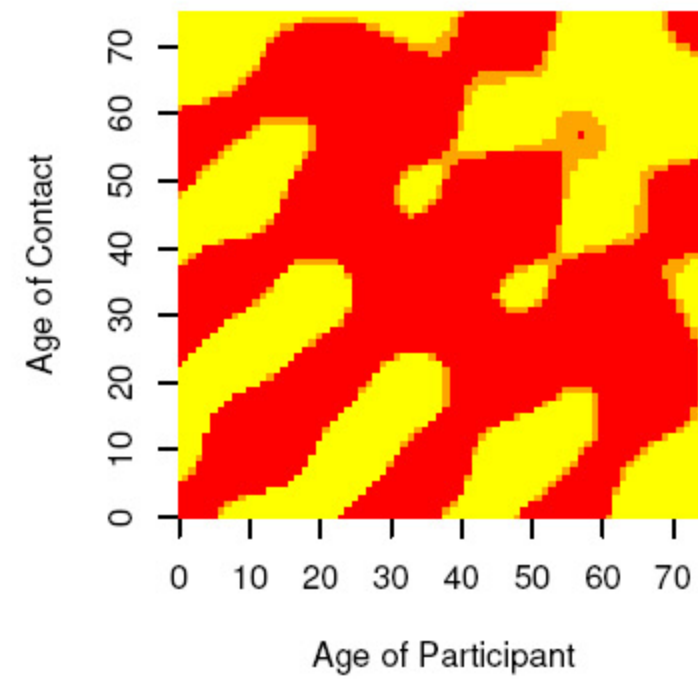

Supplement: 12879_2009_952_MOESM2_ESM.pdf [file 12879_2009_952_MOESM2_ESM.pdf]

**BE**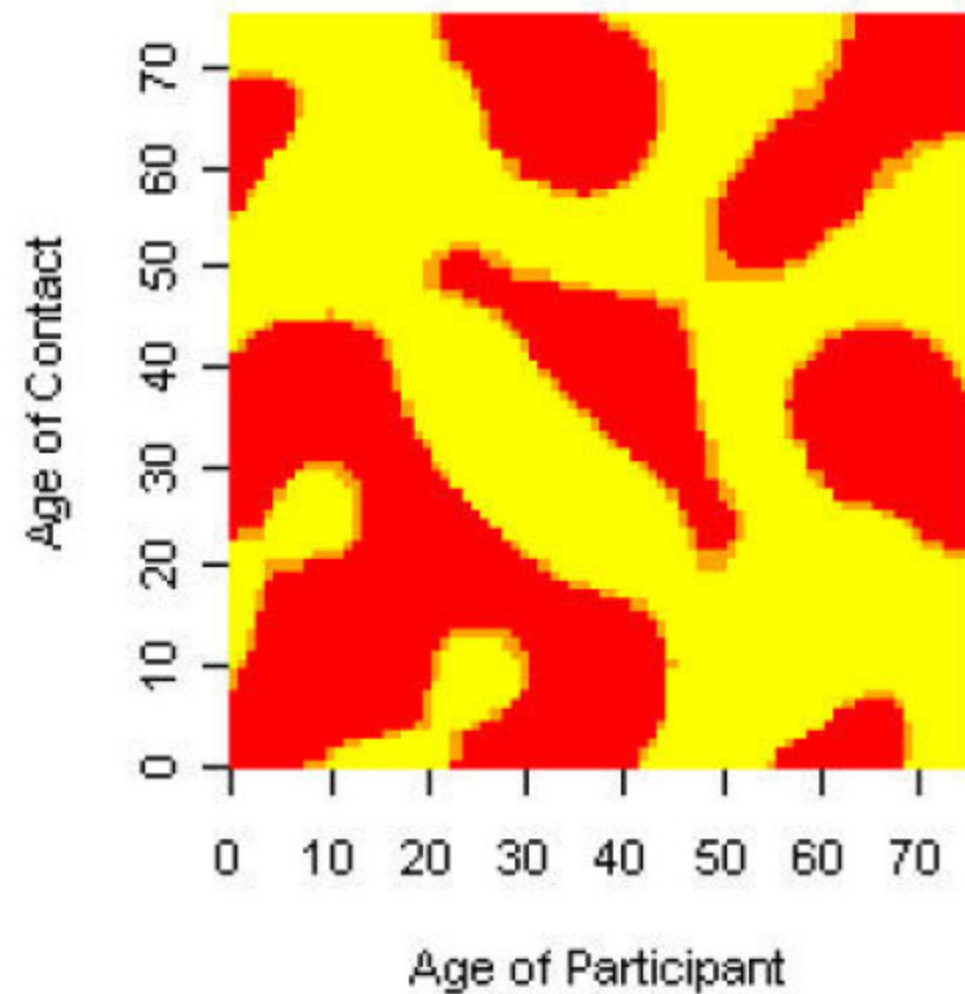**GB**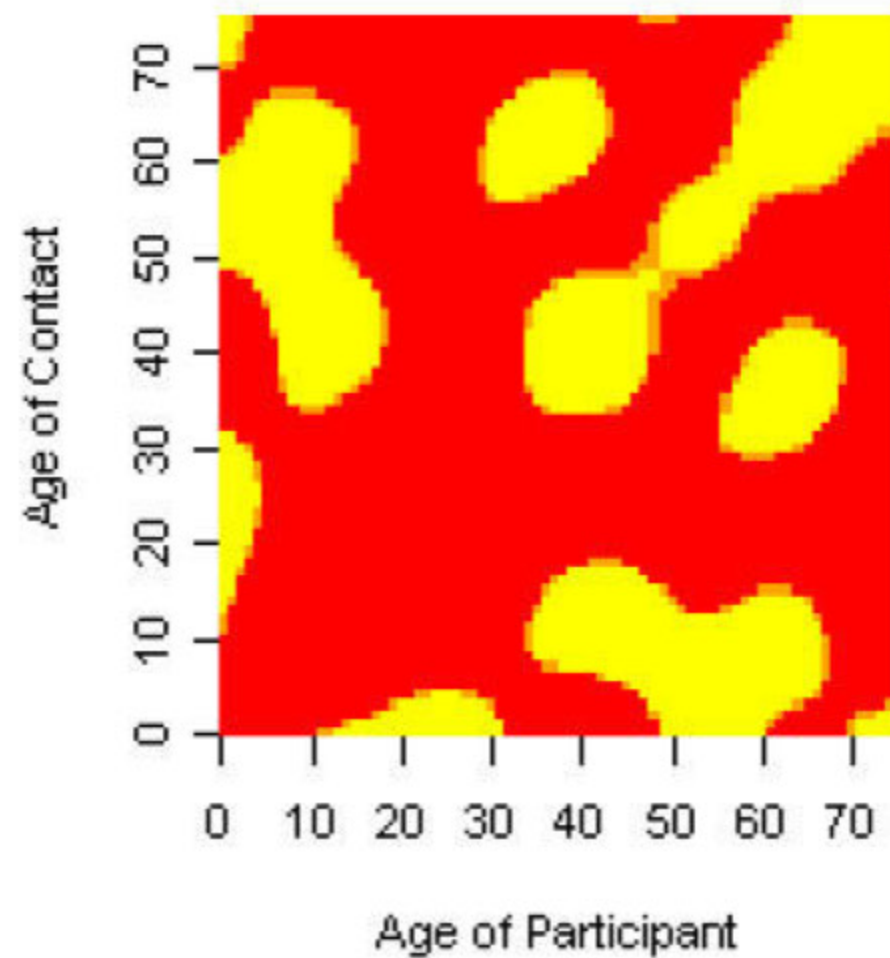**NL**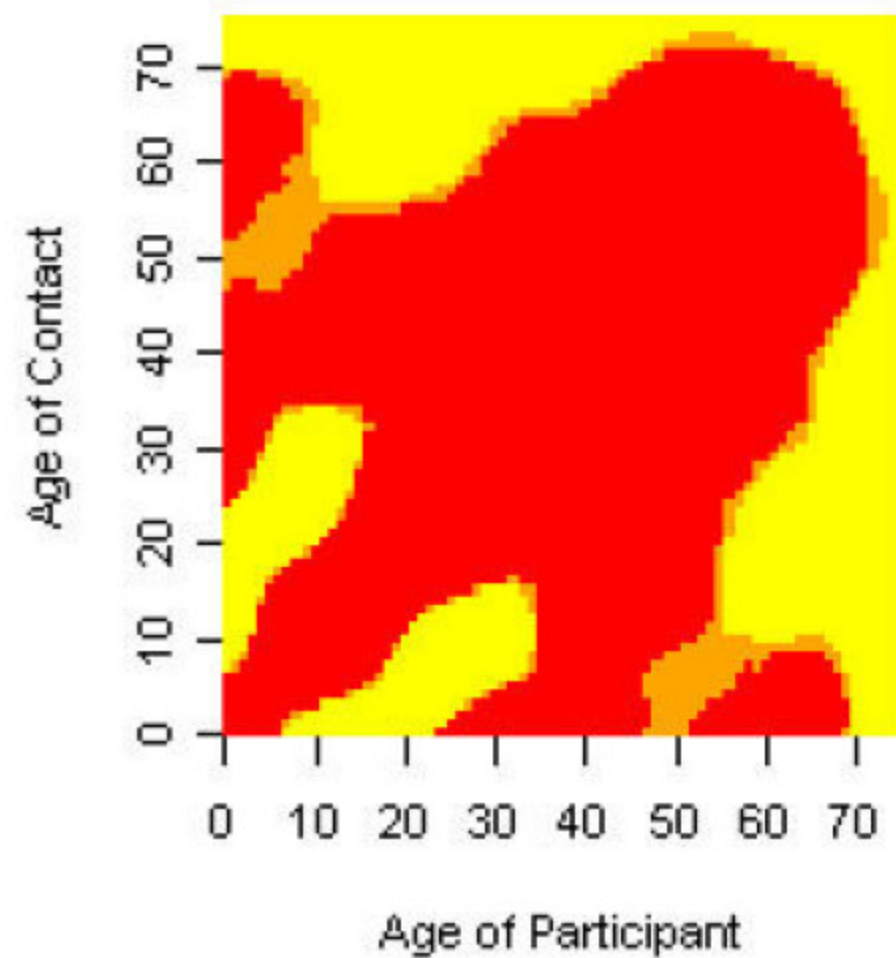

Supplement: 12879_2009_952_MOESM3_ESM.pdf [file 12879_2009_952_MOESM3_ESM.pdf]
